# Supplementary material for: Thiamine Acquisition Strategies Impact Metabolism and Competition in the Gut Microbe Bacteroides thetaiotaomicron
Source: PubMed Central journal article supplement (PMC5613172; doi:10.1128/msystems.00116-17), 2017-09-26
Supplement: sys005172138sf9.pdf [file sys005172138sf9.pdf]

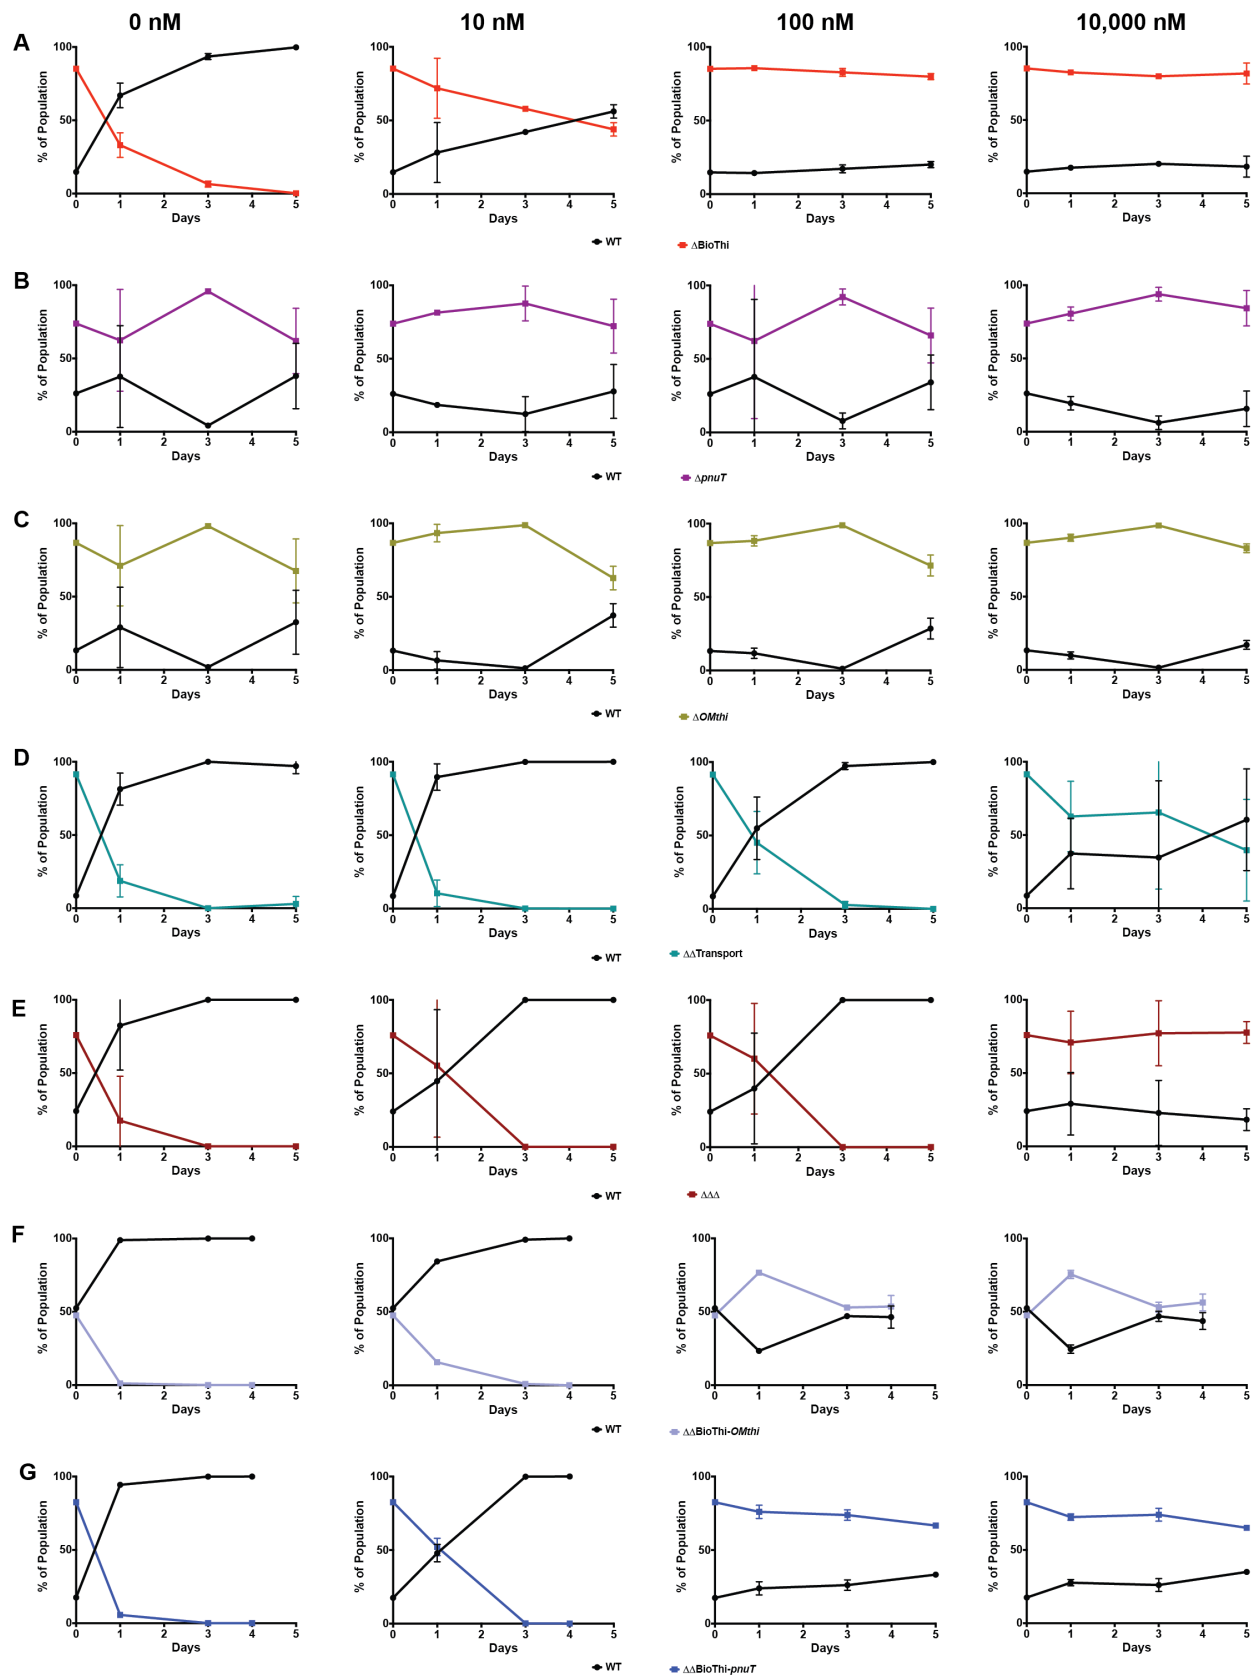

**FIG S3. Barcoded competitions of individual acquisition mutants and wildtype cells**

Abundance of wildtype (WT) and thiamine acquisition mutants during multiday competitions were tracked using qPCR. Wildtype *B. thetaiotaomicron* was competed against (A)  $\Delta$ BioThi, (B)  $\Delta$ *pnuT*, (C)  $\Delta$ *OMthi*, (D)  $\Delta\Delta$ Transport, (E)  $\Delta\Delta\Delta$  mutants, (F)  $\Delta\Delta$ BioThi-*OMthi*, and (G)  $\Delta\Delta$ BioThi-*pnuT* in 0 nM, 10 nM, 100 nM, and 10,000 nM thiamine. All competitions were performed in biological triplicate and error bars represent standard error of the mean.
